# Supplementary material
Source: Royal Society of Chemistry journal article supplement (doi:10.1039/d5em00994d)
Supplement: d5em00994d1.pdf [file d5em00994d1.pdf]

## Supplementary Information

### Unravelling ammonium and nitrate dynamics in soils: effects of soil type, moisture content, and temperature revealed by diffusive gradients in thin-films

Krishantha Kodithuwakku<sup>a</sup>, Jianyin Huang<sup>a</sup>, Casey L. Doolette<sup>a</sup>, Sean Mason<sup>b</sup>, Orlando Lam-Gordillo<sup>cd</sup>, Enzo Lombi<sup>e</sup>, Niklas J. Lehto<sup>f\*</sup>

<sup>a</sup> UniSA STEM, University of South Australia, Mawson Lakes Campus, Mawson Lakes, South Australia, 5095, Australia

<sup>b</sup> Agronomy Solutions Pty. Ltd., 3/11, Ridley Street, Hindmarsh, South Australia, 5007, Australia

<sup>c</sup> The New Zealand Institute for Earth Science, Hamilton, New Zealand.

<sup>d</sup> College of Science and Engineering, Flinders University, Adelaide, Australia.

<sup>e</sup> Future Industries Institute, University of South Australia, Mawson Lakes Campus, Mawson Lakes, South Australia, 5095, Australia

<sup>f</sup> Department of Soil and Physical Science, Faculty of Agriculture and Life Science, Lincoln University, New Zealand

\*Corresponding Author – [niklas.lehto@lincoln.ac.nz](mailto:niklas.lehto@lincoln.ac.nz)

**Table S1.** Comparison of DGT measured NH<sub>4</sub>-N at different temperatures (Te), deployment times (Dt) and soil moisture (SM) contents over the urea hydrolysis period.

| <b>PERMANOVA table of results</b> |           |           |           |                 |                |                     |
|-----------------------------------|-----------|-----------|-----------|-----------------|----------------|---------------------|
| <b>Source</b>                     | <b>df</b> | <b>SS</b> | <b>MS</b> | <b>Pseudo-F</b> | <b>P(perm)</b> | <b>Unique perms</b> |
| Dt                                | 6         | 6.27E+07  | 1.04E+07  | 131.23          | <b>0.0001</b>  | 9947                |
| Te                                | 1         | 1.47E+07  | 1.47E+07  | 185.12          | <b>0.0001</b>  | 9830                |
| SM                                | 2         | 1.13E+07  | 5.65E+06  | 71.031          | <b>0.0001</b>  | 9945                |
| Dt × Te                           | 6         | 4.45E+06  | 7.41E+05  | 9.3073          | <b>0.0001</b>  | 9937                |
| Dt × SM                           | 12        | 6.91E+06  | 5.76E+05  | 7.2339          | <b>0.0001</b>  | 9932                |
| Te × SM                           | 2         | 1.21E+06  | 6.06E+05  | 7.6169          | <b>0.0006</b>  | 9964                |
| Dt × Te × SM                      | 12        | 5.22E+06  | 4.35E+05  | 5.4636          | <b>0.0001</b>  | 9926                |
| Res                               | 84        | 6.69E+06  | 79610     |                 |                |                     |
| Total                             | 125       | 1.13E+08  |           |                 |                |                     |

**Table S2.** Comparison of DGT measured NO<sub>3</sub>-N in different temperature (Te), deployment times (Dt) and soil moisture (SM) contents over the urea hydrolysis period

| <b>PERMANOVA table of results</b> |           |           |           |                 |                |                     |
|-----------------------------------|-----------|-----------|-----------|-----------------|----------------|---------------------|
| <b>Source</b>                     | <b>df</b> | <b>SS</b> | <b>MS</b> | <b>Pseudo-F</b> | <b>P(perm)</b> | <b>Unique perms</b> |
| Dt                                | 6         | 2.12E+08  | 3.53E+07  | 49.262          | <b>0.0001</b>  | 9943                |
| Te                                | 1         | 3162      | 3162      | 0.004419        | 0.9487         | 9847                |
| SM                                | 2         | 1.42E+08  | 7.11E+07  | 99.422          | <b>0.0001</b>  | 9962                |
| Dt × Te                           | 6         | 2.82E+06  | 4.69E+05  | 0.65601         | 0.7047         | 9943                |
| Dt × SM                           | 12        | 1.18E+08  | 9.85E+06  | 13.769          | <b>0.0001</b>  | 9920                |
| Te × SM                           | 2         | 1.77E+06  | 8.83E+05  | 1.2344          | 0.305          | 9955                |
| Dt × Te × SM                      | 12        | 2.72E+07  | 2.27E+06  | 3.1688          | <b>0.001</b>   | 9951                |
| Res                               | 84        | 6.01E+07  | 7.16E+05  |                 |                |                     |
| Total                             | 125       | 5.64E+08  |           |                 |                |                     |

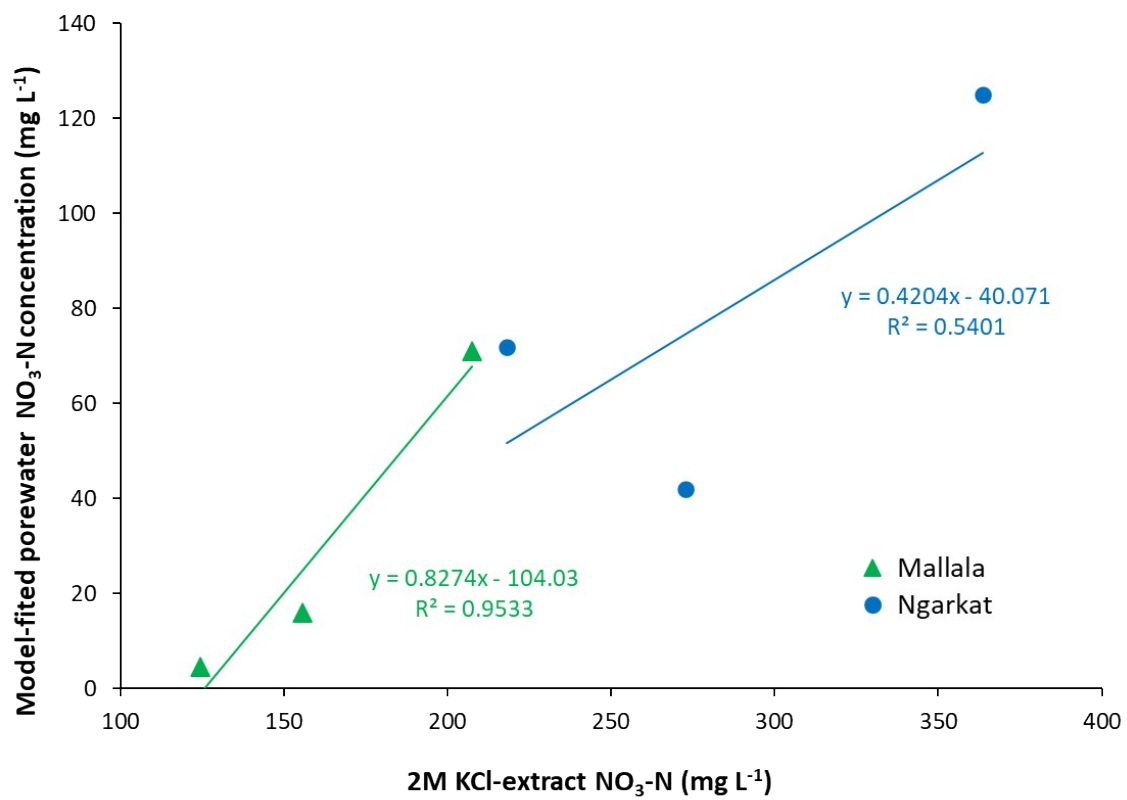

**Figure S1.** KCl-extracted vs. 3D-DIFS model fitted porewater concentrations in the Mallala and Ngarkat soils.

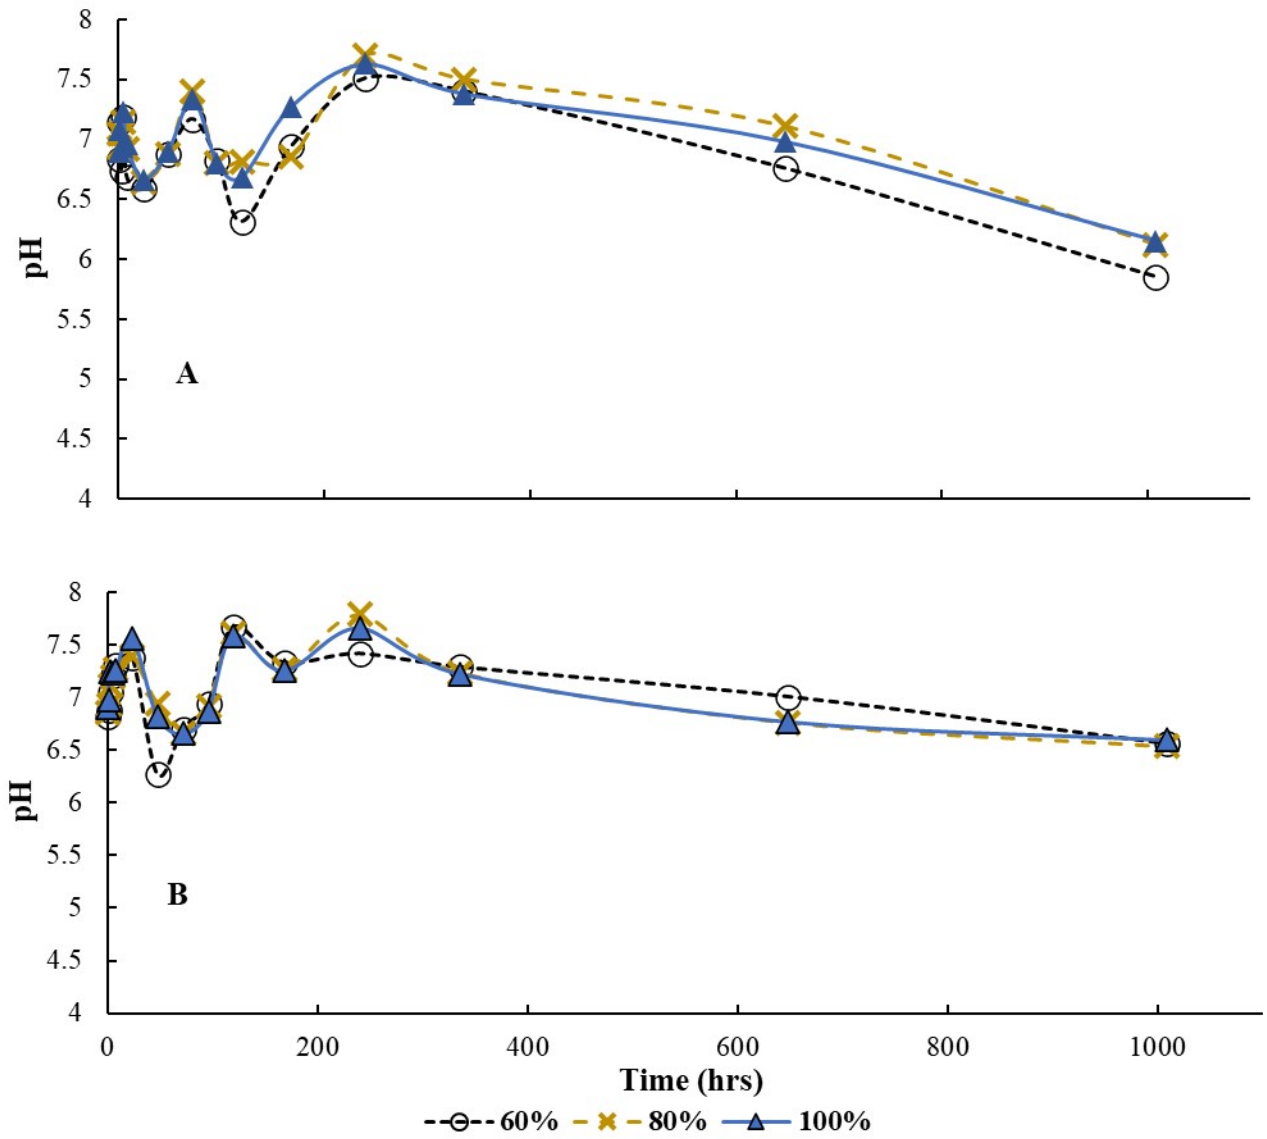

**Figure S2.** Soil pH variation over time after introduction of urea to Mallal soil at different soil moisture contents at (A) 24 °C and (B) at 15 °C.
